# Supplementary material for: Highly Porous Hydroxyapatite/Graphene Oxide/Chitosan Beads as an Efficient Adsorbent for Dyes and Heavy Metal Ions Removal
Source: MDPI journal article supplement (doi:10.3390/molecules26206127), 2021-10-11
Supplement: s1 [file s1]

## **Highly porous hydroxyapatite/graphene oxide/chitosan beads as an efficient adsorbent for dyes and heavy metal ions removal**

Nguyen Van Hoa<sup>1,\*</sup>, Nguyen Cong Minh<sup>2</sup>, Hoang Ngoc Cuong<sup>3</sup>, Pham Anh Dat<sup>1</sup>, Pham Viet Nam<sup>4</sup>,  
Pham Hau Thanh Viet<sup>5</sup>, Pham Thi Dan Phuong<sup>1</sup>, Trang Si Trung<sup>1</sup>

<sup>1</sup> Faculty of Food Technology, Nha Trang University, Vietnam; [datpa@ntu.edu.vn](mailto:datpa@ntu.edu.vn) (PA Dat); [danphuong@ntu.edu.vn](mailto:danphuong@ntu.edu.vn) (PTD Phuong); [trungts@ntu.edu.vn](mailto:trungts@ntu.edu.vn) (TS Trung)

<sup>2</sup> Institute for Biotechnology and Environment, Nha Trang University, Vietnam; [minhnc@ntu.edu.vn](mailto:minhnc@ntu.edu.vn) (NC Minh)

<sup>3</sup> Faculty of Biotechnology, Binh Duong University, Vietnam; [hncuong@bdu.edu.vn](mailto:hncuong@bdu.edu.vn) (HN Cuong)

<sup>4</sup> Faculty of Fishery, Ho Chi Minh City University of Food Industry, Vietnam; [nampv.fisheries@gmail.com](mailto:nampv.fisheries@gmail.com) (PV Nam)

<sup>5</sup> Faculty of Chemistry, Da Lat University, Vietnam; [vietpht@dlu.edu.vn](mailto:vietpht@dlu.edu.vn) (PHT Viet)

\* Correspondence: [hoanv@ntu.edu.vn](mailto:hoanv@ntu.edu.vn) (NV Hoa)

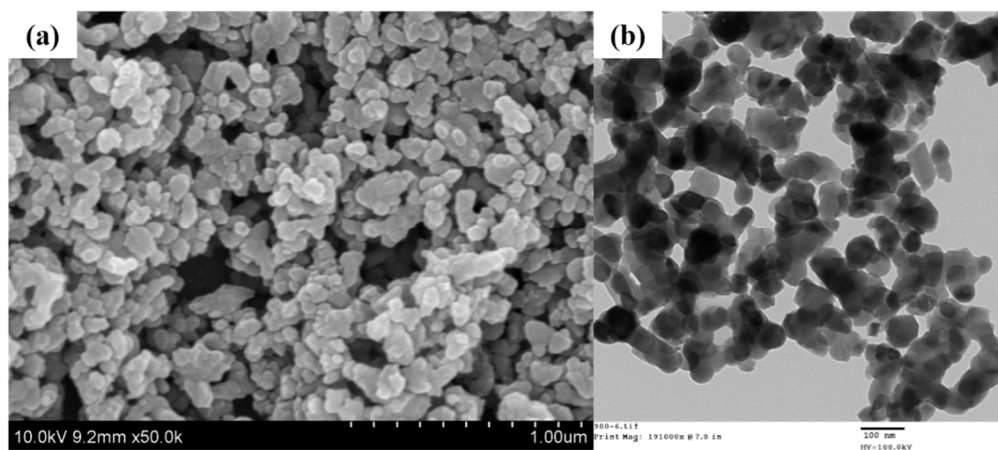

**Figure S1.** (a) SEM and (b) TEM images of hydroxyapatite.

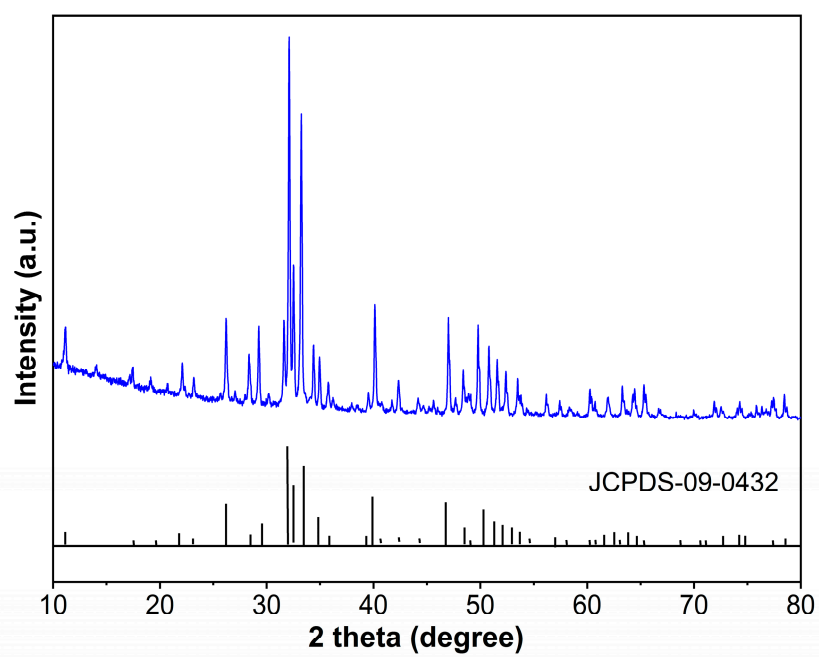

**Figure S2.** XRD pattern of hydroxyapatite and its JCPDS card No. 09-0432.

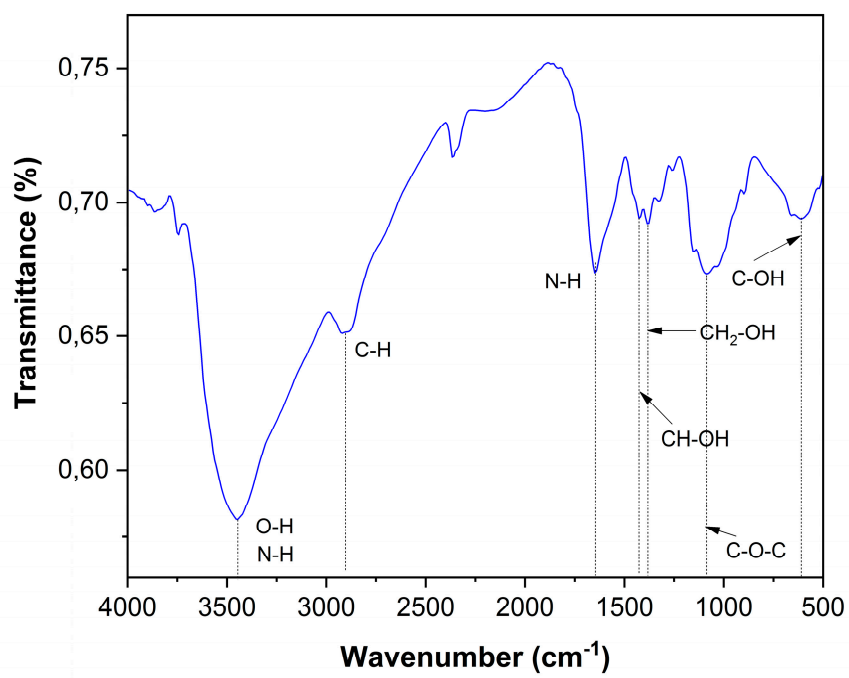

Figure S3. FTIR spectrum of chitosan.

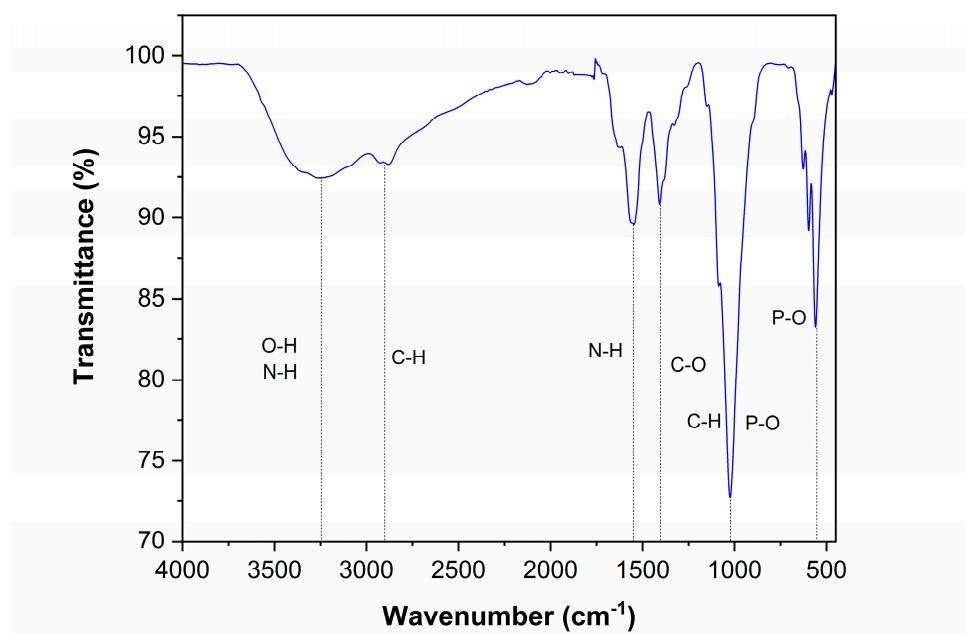

**Figure S4.** FTIR spectrum of hydroxyapatite.

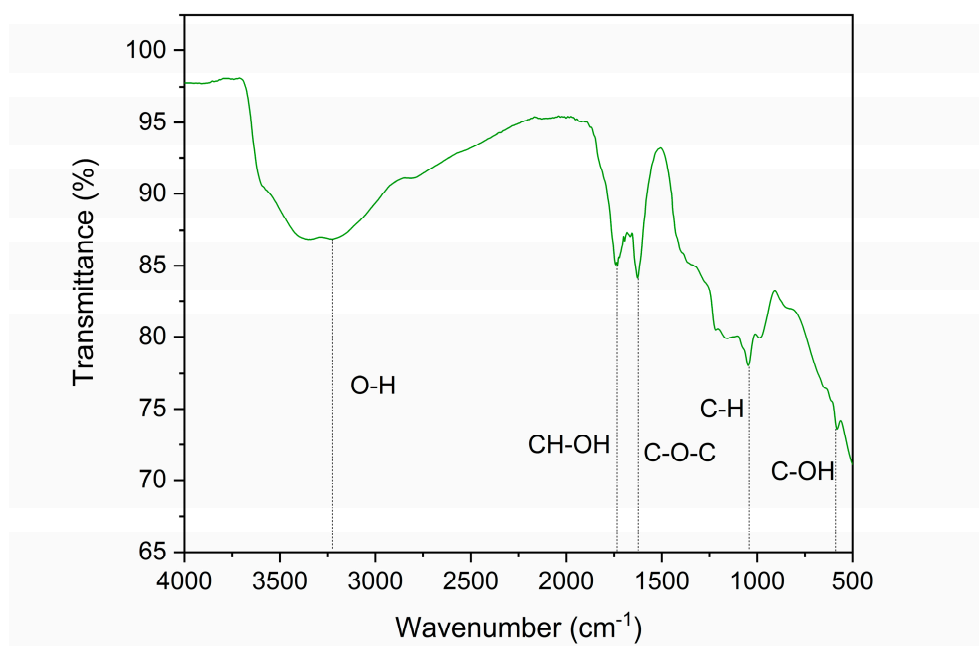

**Figure S5.** FTIR spectrum of graphene oxide.

**Table S1.** Maximum adsorption capacity of various chitosan-based materials for MB

| Chitosan-based adsorbent                                                         | Adsorption capacity<br>(mg g <sup>-1</sup> ) | Reference  |
|----------------------------------------------------------------------------------|----------------------------------------------|------------|
| Cross-linked chitosan/sepiolite composite                                        | 40.986                                       | [1]        |
| Lignin-chitosan blends                                                           | 36.25                                        | [2]        |
| H <sub>2</sub> SO <sub>4</sub> crosslinked magnetic chitosan nanocomposite beads | 20.408                                       | [3]        |
| Chitosan/Fe <sub>3</sub> O <sub>4</sub> /GO nanocomposite                        | 30.10                                        | [4]        |
| Chitosan-crosslinked BiFeO <sub>3</sub> /biochar                                 | 18.942                                       | [5]        |
| Chitosan–montmorillonite/polyaniline composite                                   | 111.00                                       | [6]        |
| Alginate-chitosanmontmorillonite hydrogel beads                                  | 137.2                                        | [7]        |
| Crosslinked chitosan/bentonite composite                                         | 97.09                                        | [8]        |
| Chitosan/GO/HA beads                                                             | 99.00                                        | This study |

**Table S2.** Maximum adsorption capacity of various chitosan-based materials for Cu(II) ions

| Chitosan-based adsorbent                                                    | Adsorption capacity<br>(mg g <sup>-1</sup> ) | Reference  |
|-----------------------------------------------------------------------------|----------------------------------------------|------------|
| Magnetic chitosan composite                                                 | 216.6                                        | [9]        |
| Fe <sub>3</sub> O <sub>4</sub> -chitosan/EDTA composite                     | 225.0                                        | [10]       |
| Malic acid-enhanced chitosan hydrogel beads                                 | 183.8                                        | [11]       |
| ZIF-67 modified bacterial cellulose/chitosan composite aerogel              | 200.6                                        | [12]       |
| Magnetic bentonite/carboxymethyl chitosan/sodium alginate<br>hydrogel beads | 56.79                                        | [13]       |
| Chitosan-pectin gel beads                                                   | 169.4                                        | [14]       |
| Snail shell/hydroxyapatite/chitosan composite                               | 16.741                                       | [15]       |
| Hydroxyapatite-coated-limestone/chitosan composite                          | 130.75                                       | [16]       |
| Chitosan/GO/HA beads                                                        | 256.41                                       | This study |



## References

1. Marrakchi, F.; Khanday, W.A.; Asif, M.; Hameed, B.H. Cross-linked chitosan/sepiolite composite for the adsorption of methylene blue and reactive orange 16. *Inter. J. Biol. Macromol.* **2016**, *93*, 1231-1239.
2. Albadarin, A.; Collins, M.; Naushad, M.; Shirazian, S.; Walker, G.; Mangwandi, C. Activated lignin-chitosan extruded blends for efficient adsorption of methylene blue. *Chem. Eng. J.* **2017**, *307*, 264-272.
3. Rahmi; Ismaturrehmi; Mustafa, I. Methylene blue removal from water using H<sub>2</sub>SO<sub>4</sub> crosslinked magnetic chitosan nanocomposite beads. *Microchem. J.* **2019**, *144*, 397-402.
4. Tran, H.V.; Bui, L.T.; Dinh, T.T.; Le, D.H.; Huynh, C.D.; Trinh, A.X. Graphene oxide/Fe<sub>3</sub>O<sub>4</sub>/chitosan nanocomposite: a recoverable and recyclable adsorbent for organic dyes removal. Application to methylene blue. *Mater. Res. Express* **2017**, *4*, 035701.
5. Design and preparation of chitosan-crosslinked bismuth ferrite/biochar coupled magnetic material for methylene blue removal. *Int. J. Environ. Res. Public Health* **2020**, *17*, 6-25.
6. Minisy, I.M.; Salahuddin, N.A.; Ayad, M.M. Adsorption of methylene blue onto chitosan-montmorillonite/polyaniline nanocomposite. *Appl. Clay Sci.* **2021**, *203*, 105993.
7. Wang, W.; Zhao, Y.; Bai, H.; Zhang, T.; Ibarra-Galvan, V.; Song, S. Methylene blue removal from water using the hydrogel beads of poly(vinyl alcohol)-sodium alginate-chitosan-montmorillonite. *Carbohydr. Polym.* **2018**, *198*, 518-528.
8. Bulut, Y.; Karaer, H. Adsorption of methylene blue from aqueous solution by crosslinked chitosan/bentonite composite. *J. Dispers. Sci. Technol.* **2015**, *36*, 61-67.
9. Li, J.; Jiang, B.; Liu, Y.; Qiu, C.; Hu, J.; Qian, G.; Guo, W.; Ngo, H.H. Preparation and adsorption properties of magnetic chitosan composite adsorbent for Cu<sup>2+</sup> removal. *J. Clean. Prod.* **2017**, *158*, 51-58.
10. Chen, B.; Zhao, H.; Chen, S.; Long, F.; Huang, B.; Yang, B.; Pan, X. A magnetically recyclable chitosan composite adsorbent functionalized with EDTA for simultaneous capture of anionic dye and heavy metals in complex wastewater. *Chem. Eng. J.* **2019**, *356*, 69-80.
11. Zhang, Y.; Lin, S.; Qiao, J.; Kołodziejka, D.; Ju, Y.; Zhang, M.; Cai, M.; Deng, D.; Dionysiou, D.D. Malic acid-enhanced chitosan hydrogel beads (mCHBs) for the removal of Cr(VI) and Cu(II) from aqueous solution. *Chem. Eng. J.* **2018**, *353*, 225-236.
12. Li, D.; Tian, X.; Wang, Z.; Guan, Z.; Li, X.; Qiao, H.; Ke, H.; Luo, L.; Wei, Q. Multifunctional adsorbent based on metal-organic framework modified bacterial cellulose/chitosan composite aerogel for high efficient removal of heavy metal ion and organic pollutant. *Chem. Eng. J.* **2020**, *383*, 123-127.
13. Zhang, H.; Omer, A.M.; Hu, Z.; Yang, L.Y.; Ji, C.; Ouyang, X. Fabrication of magnetic bentonite/carboxymethyl chitosan/sodium alginate hydrogel beads for Cu (II) adsorption. *Inter. J. Biol. Macromol.* **2019**, *135*, 490-500.
14. Shao, Z.; Lu, J.; Ding, J.; Fan, F.; Sun, X.; Li, P.; Fang, Y.; Hu, Q. Novel green chitosan-pectin gel beads for the removal of Cu(II), Cd(II), Hg(II) and Pb(II) from aqueous solution. *Inter. J. Biol. Macromol.* **2021**, *176*, 217-225.
15. Bambaero, A.; Bazargan-Lari, R. Simultaneous removal of copper and zinc ions by low cost natural snail shell/hydroxyapatite/chitosan composite. *Chin. J. Chem. Eng.* **2021**, *33*, 221-230.
16. Peng, X.; Li, Y.; Liu, S.; Jiang, T.; Chen, W.; Li, D.; Yuan, J.; Xu, F. A Study of adsorption behaviour of Cu(II) on hydroxyapatite-coated-limestone/chitosan composite. *J. Polym. Environ.* **2021**, *29*, 1727-1741.
